# Supplementary material for: Butyrate combined with niacin promotes colonic metabolism and antimicrobial peptide expression to alleviate ETEC-induced colonic barrier dysfunction in weaned piglets
Source: Research Square preprint supplement (doi:10.21203/rs.3.rs-8061761/v1), 2025-11-25
Supplement: Supplementary file 1 [file 310eb7068911cd3b07bd8fe2.docx]

Table S1. Composition and nutrient level of basal diet (as-fed basis, %)

| Ingredient | Content, % | Nutrient level | Content, % |
| --- | --- | --- | --- |
| Corn starch | 48.50 | Digestible energy, kcal/kg | 3792 |
| Low protein whey powder | 15.00 | Crude protein | 20.09 |
| Soybean protein | 15.50 | SID Lys | 1.44 |
| Whey protein concentrate | 8.00 | SID Met+Cys | 1.01 |
| Inulin | 3.00 | SID Thr | 0.82 |
| Soybean oil | 1.00 | SID Try | 0.27 |
| Saccharose | 3.00 | Ca | 0.8 |
| Choline chloride, 50% | 0.30 | STTD P | 0.41 |
| NaCl | 0.35 |  |  |
| NaHCO3 | 0.15 |  |  |
| KCl | 0.50 |  |  |
| MgSO4 | 0.30 |  |  |
| CaHPO4 | 1.50 |  |  |
| *L*-Lys | 0.25 |  |  |
| *DL*-Met | 0.15 |  |  |
| *L*-Thr | 0.10 |  |  |
| Premix1 | 1.50 |  |  |
| Total | 100.00 |  |  |

1 The premix provided following per kg of the diet: vitamin A, 11 000 IU; vitamin B12 87.5 μg; vitamin B1 5 mg; vitamin B2 17.5 mg; vitamin B6 10 mg; biotin 0.25 mg; vitamin D3, 1100 IU; vitamin K 2.5 mg; vitamin E, 80 IU; D-[calcium pantothenate](javascript:;) 50 mg; folic acid 1.5 mg; Mn (MnSO4•H2O), 80 mg; Zn (ZnSO4•H2O), 289 mg; Fe (ferrous fumarate); 333 mg; Cu (CuSO4•5H2O), 24 mg; Mn (MnSO4•H2O) 12 mg; and Se (Na2SeO3), 0.69 mg; I（CaI2O6）0.23 mg. Except for measured values of the crude protein and calcium, others are calculated values.

Table S2. Primer sequences for the qRT-PCR analysis

| Gene | Forward sequence (5′→3′) | Reverse sequence (5′→3′) |
| --- | --- | --- |
| *Claudin* | ACGGCCCAGGCCATCTAC | TGCCGGGTCCGGTAGATG |
| *ZO-1* | AGCCCGAGGCGTGTTT | GGTGGGAGGATGCTGTTG |
| *Occludin* | GCACCCAGCAACGACAT | CATAGACAGAATCCGAATCAC |
| *MUC2* | CTGCTCCGGGTCCTGTGGGA | CCCGCTGGCTGGTGCGATAC |
| *PBD1* | TCCTTGTATTCCTCCTCA | ACACGCCTTTATTCCTTA |
| *PBD2* | CCAGAGGTCCGACCACTACA | GGTCCCTTCAATCCTGTTGAA |
| *PBD3* | GAAGTCTACAGAAGCCAAAT | GGTTTAGGGACACCGCAC |
| *PR-39* | CAAGGCCACCTCCGTTTT | GGTAACAAATAGCACCATAA |
| *IL-10* | GCTGAAGACCCTCAGGCTGA | TTGCTCTTGTTTTCACAGGGC |
| *IL-4* | TCACCTCCCAACTGATCCCA | ATGCACGAGTTCTTTCTCGC |
| *IL-1β* | CTCCAGCCAGTCTTCATTGTTC | TGCCTGATGCTCTTGTTCCA |
| *IL-8* | TTCGATGCCAGTGCATAAATA | CTGTACAACCTTCTGCACCCA |
| *IL-6* | TGGCTACTGCCTTCCCTACC | CAGAGATTTTGCCGAGGATG |
| *TNF-α* | CACGCTCTTCTGCCTACTGC | GTCCCTCGGCTTTGACATT |
| *NF-κB* | CTCGCACAAGGAGACATGAA | ACTCAGCCGGAAGGCATTAT |
| *MyD88* | TGGTGGTGGTTGTCTCTGATGA | TGGAGAGAGGCTGAGTGCAA |
| *TLR4* | CGTGCAGGTGGTTCCTAACA | AAAGGCTCCCAGGGCTAAAC |
| *β-actin* | CACGCCATCCTGCGTCTGGA | AGCACCGTGTTGGCGTAGAG |

Table S3. The antibodies in this study

| Antibody | Source | Identifier |
| --- | --- | --- |
| Anti-Occludin antibody | Abcam | ab31721 |
| Anti-Claudin 1 antibody | Abcam | ab129119 |
| Anti-ZO-1 antibody | Thermo Fisher Scientific | #61-7300 |
| Anti-MUC2 antibody | Abcam | ab134119 |
| Anti-IL-1 beta | Abcam | ab216995 |
| Anti-IL-10 antibody | Abcam | ab34843 |
| TNF-α Antibody | Cell signaling technology | #3707 |
| Anti-Histone H3 (phospho S10) | Abcam | ab14955 |
| Anti-Histone H3 (acetyl K9) antibody | Abcam | ab4441 |
| Anti-Histone H3 (acetyl K27) antibody | Abcam | ab4729 |
| Anti-Histone H3 antibody | Abcam | ab1791 |
| Beta-Actin Antibody | Affinity | T0022 |
| HRP-conjugated Affinipure Goat Anti-Mouse IgG(H+L) | Proteintech | SA00001-1 |
| HRP-conjugated Affinipure Goat Anti-Rabbit IgG(H+L) | Proteintech | SA00001-2 |
