# Supplementary material for: Butyrate combined with niacin promotes colonic metabolism and antimicrobial peptide expression to alleviate ETEC-induced colonic barrier dysfunction in weaned piglets
Source: Research Square preprint supplement (doi:10.21203/rs.3.rs-8061761/v1), 2025-11-25

Uncropped and unprocessed images of the complete gel and blot in Figure 3C


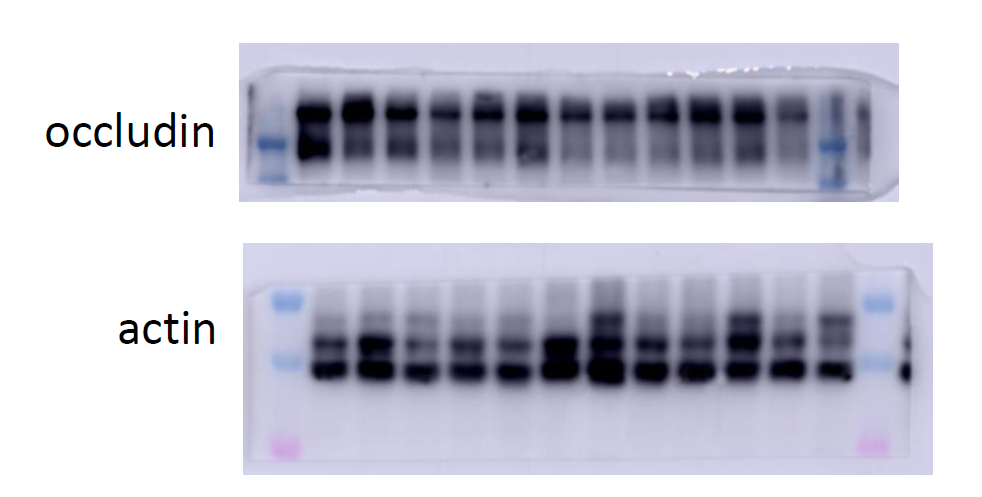


Uncropped and unprocessed images of the complete gel and blot in Figure 5G


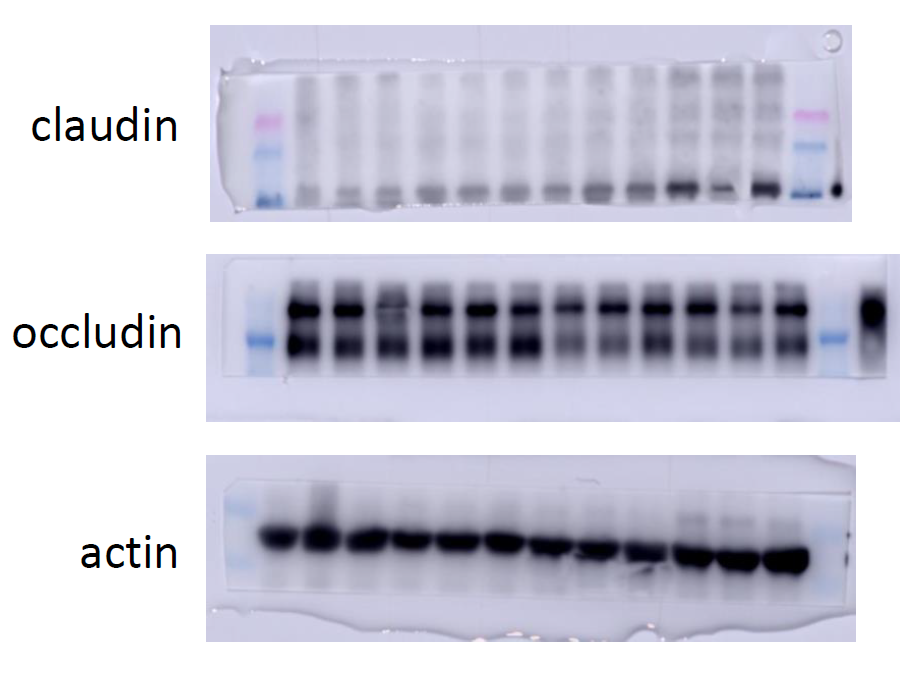


Uncropped and unprocessed images of the complete gel and blot in Figure 7A


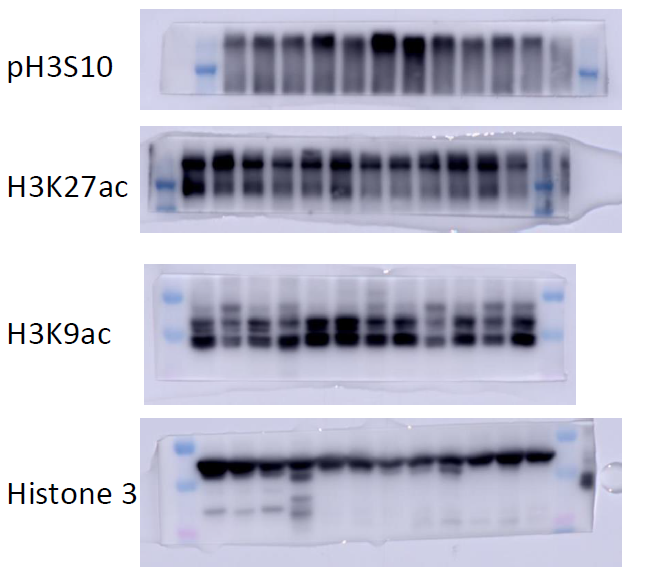
Uncropped and unprocessed images of the complete gel and blot in Figure 7B
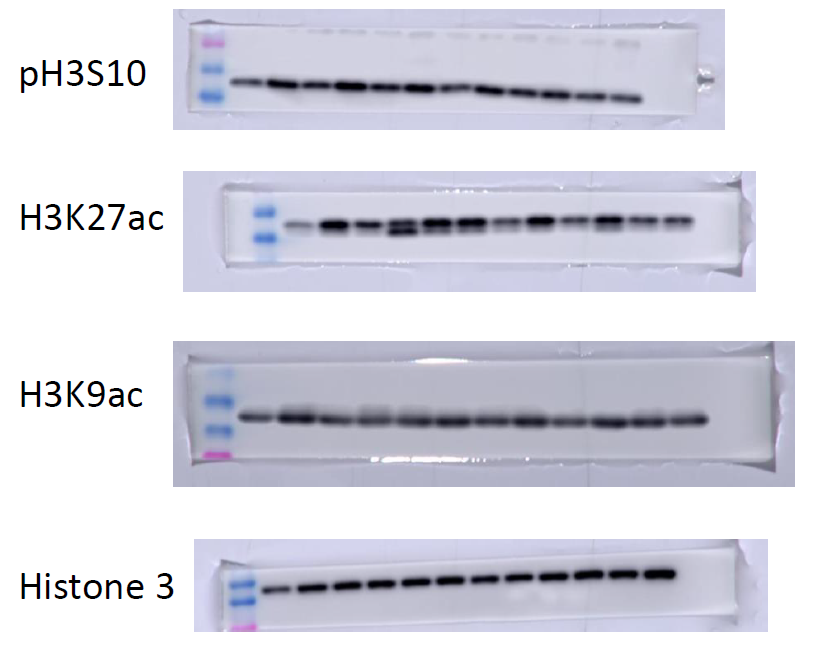

Supplement: Supplementary file 2 [file 3d83f8ffef246eb80b682ffd.docx]
